# Supplementary material for: Mapping snow depth from manned aircraft on landscape scales at centimeter resolution using structure-from-motion photogrammetry
Source: Copernicus journal article supplement (doi:10.5194/tc-9-1445-2015), 2015-08-05
Supplement: Supplementary file 1 [file tc-9-1445-2015-supplement.pdf]

Supplement of The Cryosphere, 9, 1445–1463, 2015  
<http://www.the-cryosphere.net/9/1445/2015/>  
doi:10.5194/tc-9-1445-2015-supplement  
© Author(s) 2015. CC Attribution 3.0 License.

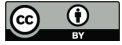

*Supplement of*

## **Mapping snow depth from manned aircraft on landscape scales at centimeter resolution using structure-from-motion photogrammetry**

**M. Nolan et al.**

*Correspondence to:* M. Nolan ([matt2013@drmattnolan.org](mailto:matt2013@drmattnolan.org))

The copyright of individual parts of the supplement might differ from the CC-BY 3.0 licence.

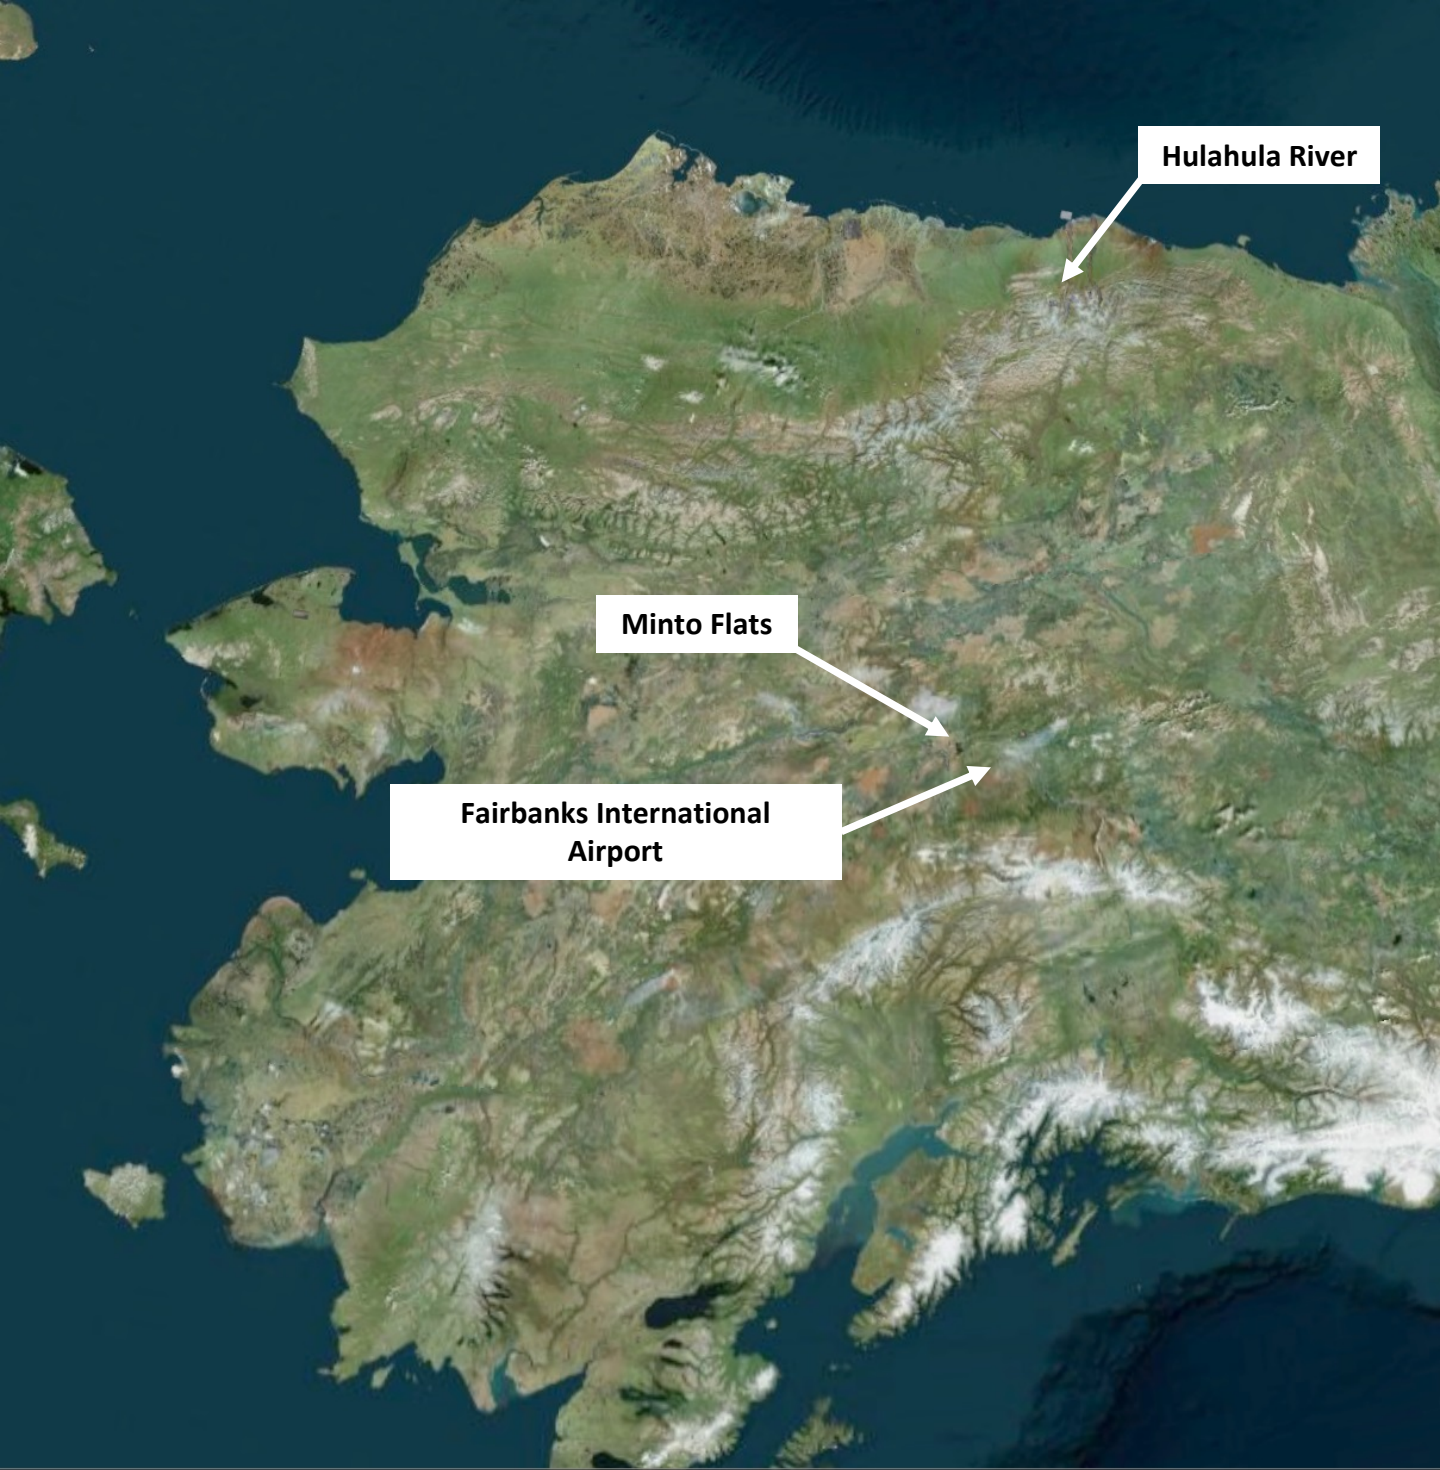

Hulahula River

Minto Flats

Fairbanks International  
Airport

Figure S1. Alaska Location Map. Shown here are the three study areas analyzed in the paper. The Hulahula River site is approximately 500 km from Fairbanks. Our maps can be viewed in 3D at [www.fairbanksfodar.com/fodar-earth](http://www.fairbanksfodar.com/fodar-earth) .

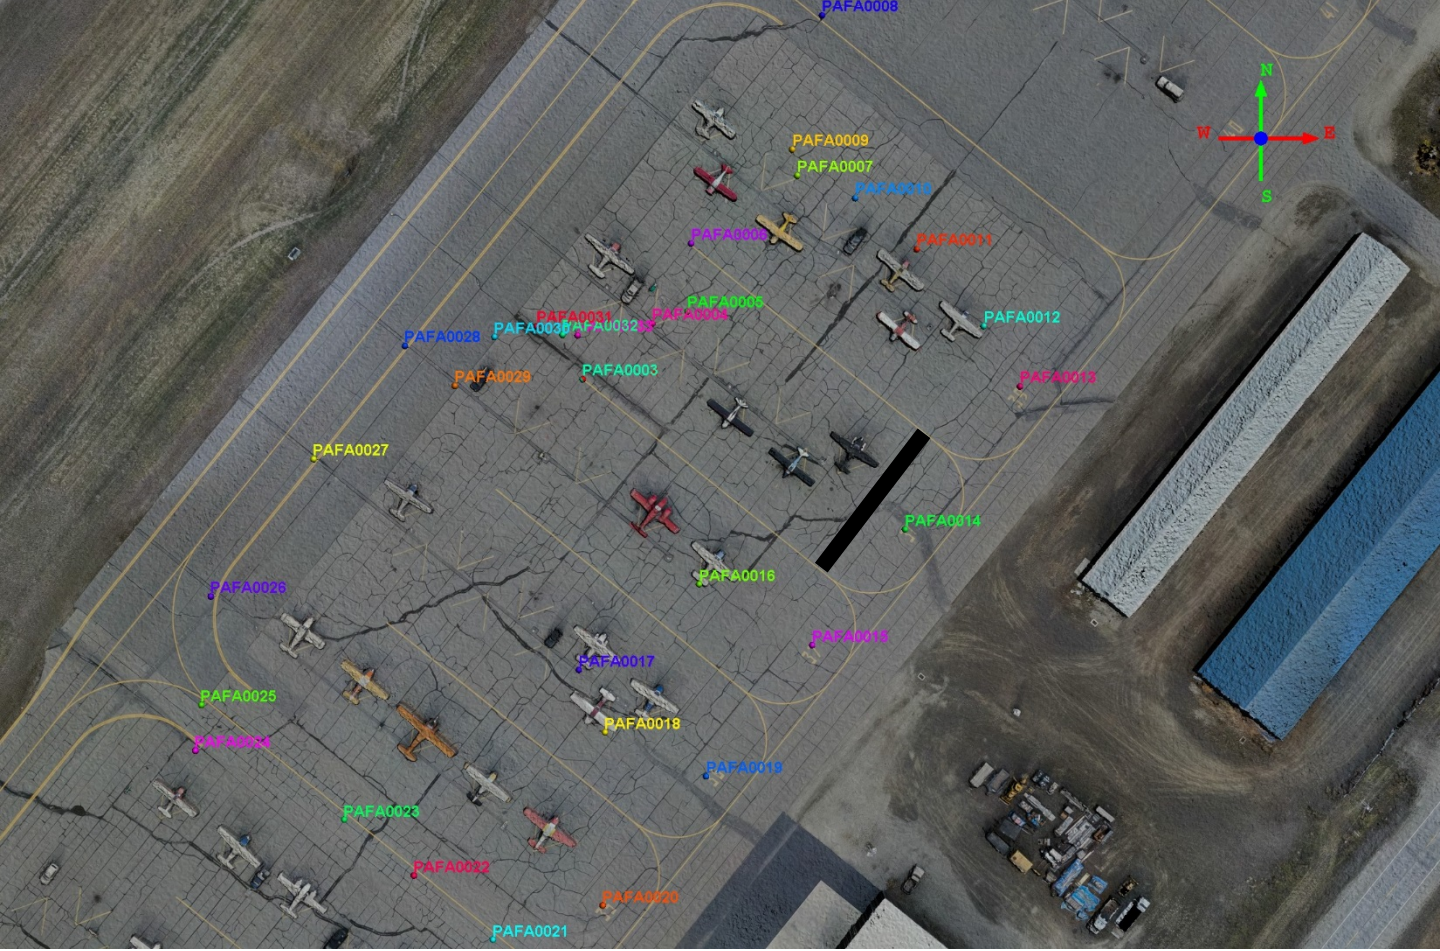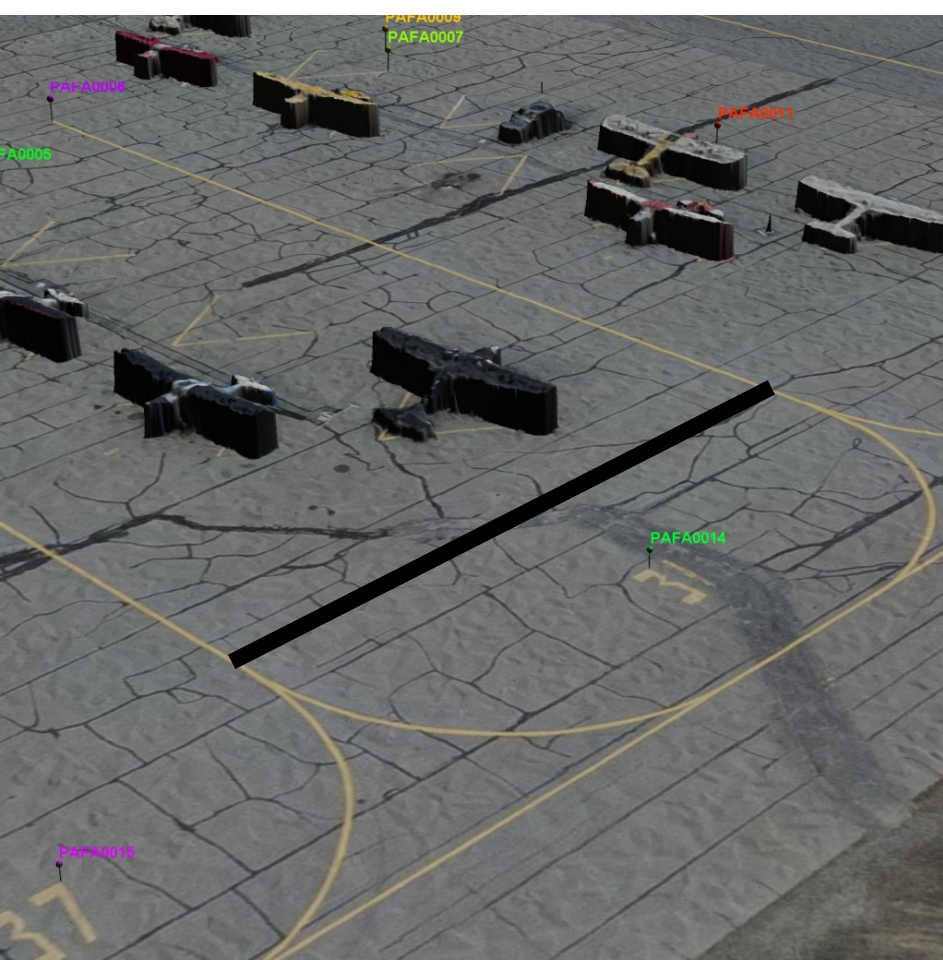

Figure S2 A-B. GCPs from Fairbanks International Airport. These photo-identifiable GCPs were made on taxiway letters and intersections of lines or cracks. Black scale bar shown in each photo is approximately 33 m long.

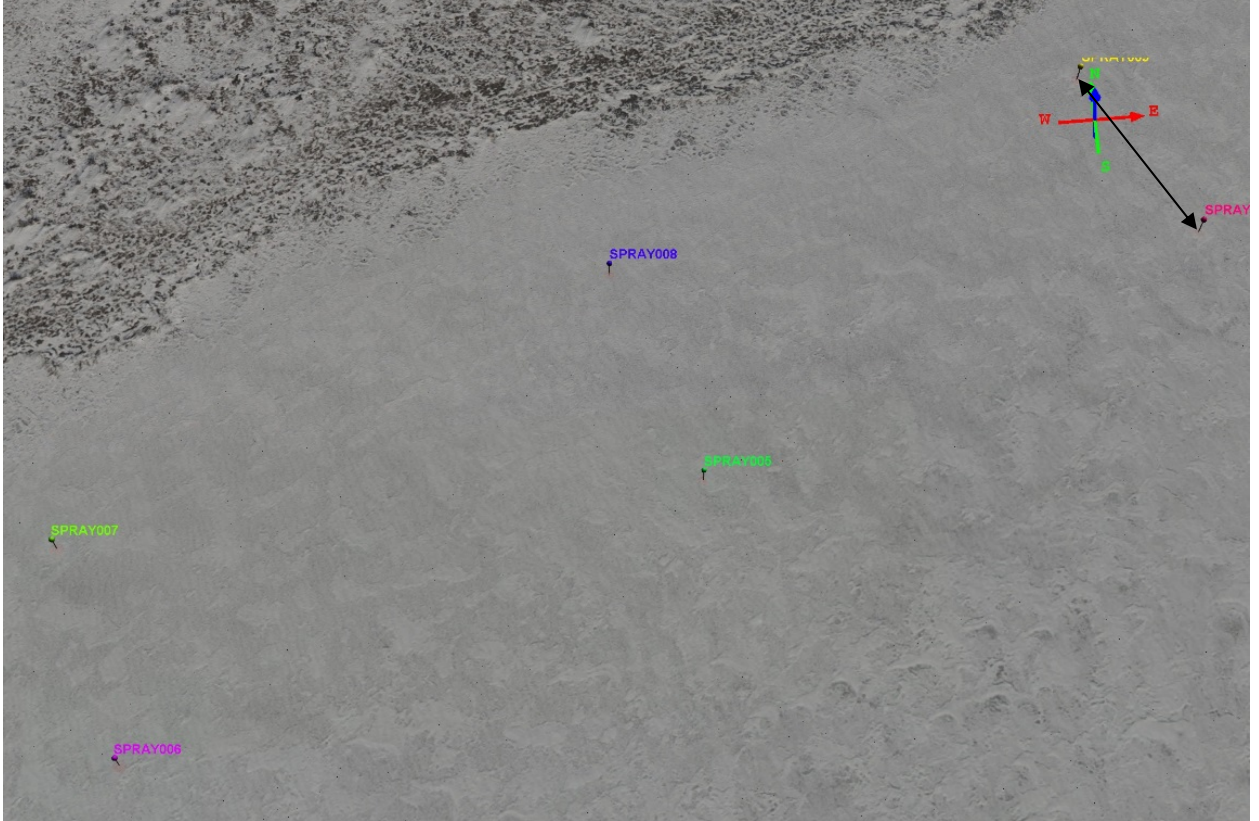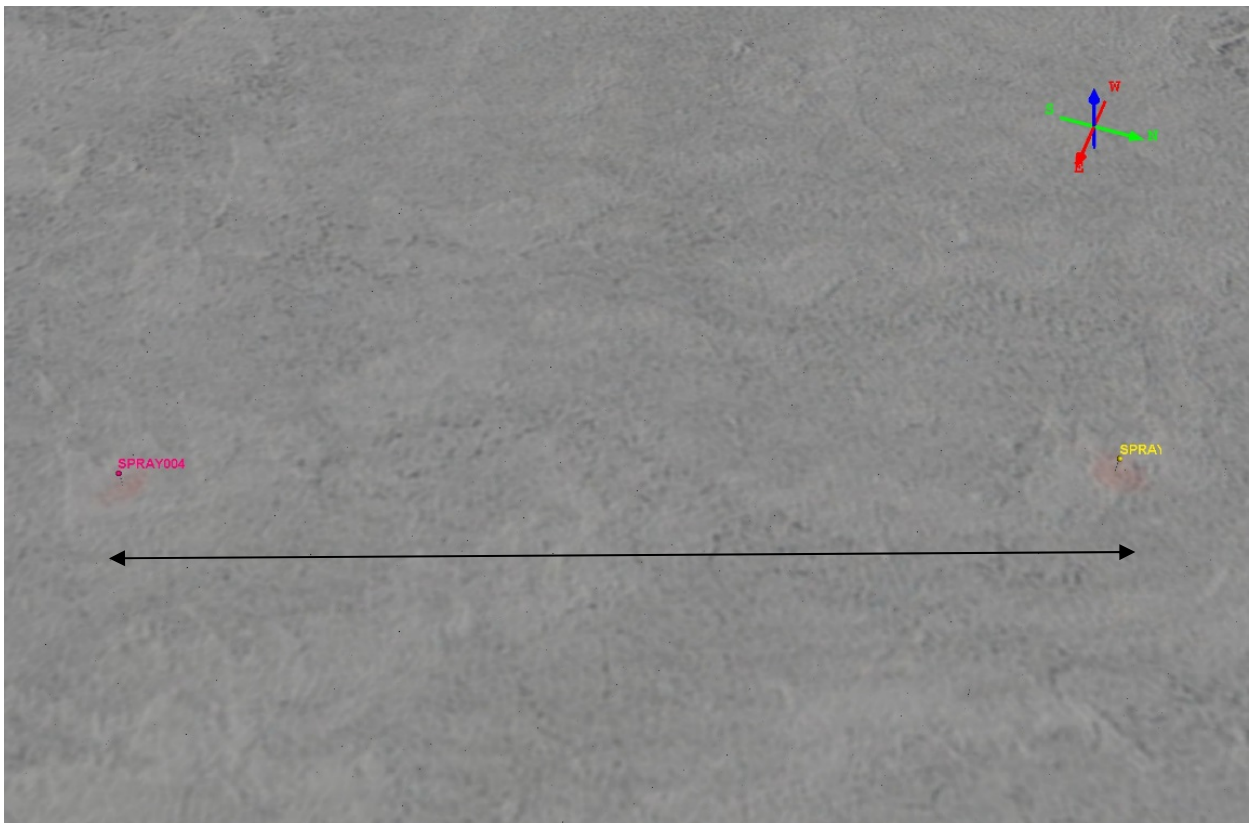

Figure S3 A-B. GCPs from Minto Flats. These photo identifiable markers were created by orange spray paint onto snow. These orange circles have approximately 30 cm radius. Arrowed line is approximately 27 m long for scale in these oblique images.
